# Supplementary material
Source: PubMed Central journal article supplement (PMC4828310)
Supplement: NIHMS741778-supplement-sup_figs.pdf [file NIHMS741778-supplement-sup_figs.pdf]

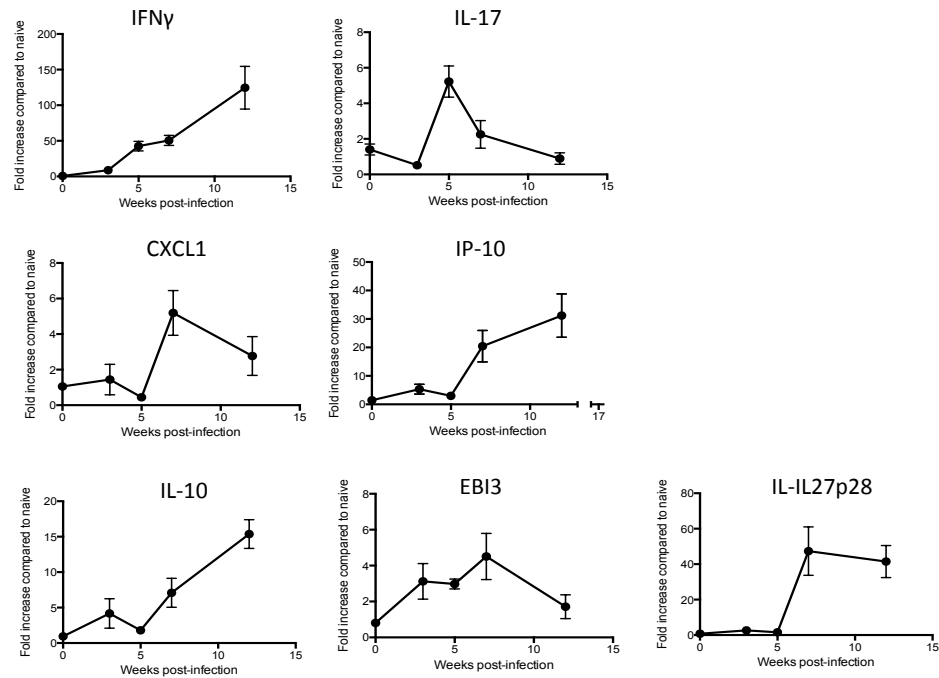

**Figure S1. Transcriptional profiles of selected cytokines and chemokines in ear dermal cells during the course of infection.** C57BL/6 mice were infected in the ear dermis with 1000 *LmSd* metacyclic promastigotes and total mRNA was isolated from the ear tissue at the indicated times during infection, reverse transcribed and analyzed by real-time PCR. Target genes were normalized to endogenous control, and the values shown are the fold increase relative to expression in naïve ears. Data are represented as means  $\pm$  SD of 8 samples (4 mice, 8 ears) at each time point. The results are representative of 2 independent experiments.

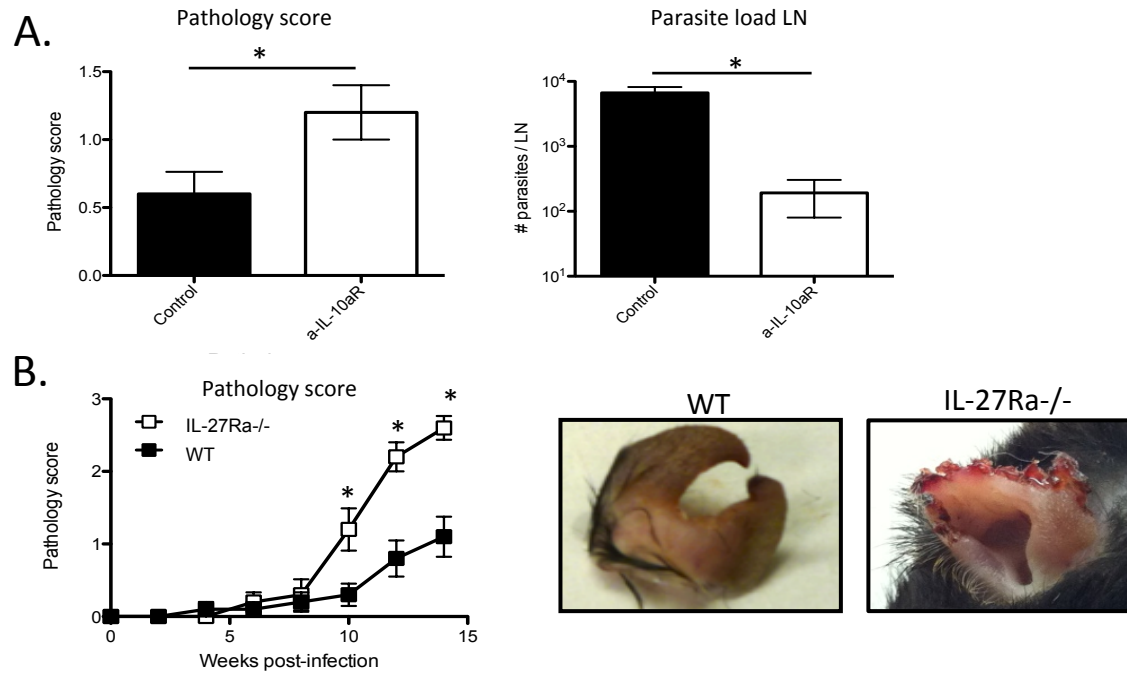

**Figure S2. *LmSd* induced IL-10 and IL-27 dampen the pathologic response. (A)** C57BL/6 mice were infected in the ear dermis with 1000 *LmSd* metacyclic promastigotes and from wk 12 post-infection were treated with anti-IL-10αR Ab every 4 days for 2 wks. Mice were sacrificed at wk 14 post-infection. Parasite burden and pathology score are represented as the mean ± SD of 10 ears, 5 mice/group. \* p<0.05. **(B)** Pathology score over the course of infection in C57BL/6 and IL-27Ra<sup>-/-</sup> mice infected in the ear dermis with 1x10<sup>4</sup> *LmSd* metacyclic promastigotes. Data are means ± SD of 10 ears, 5 mice/group. \* p<0.05. Photographs are of ear lesions in wt and IL-27Ra<sup>-/-</sup> mice at 14 wks post-infection.

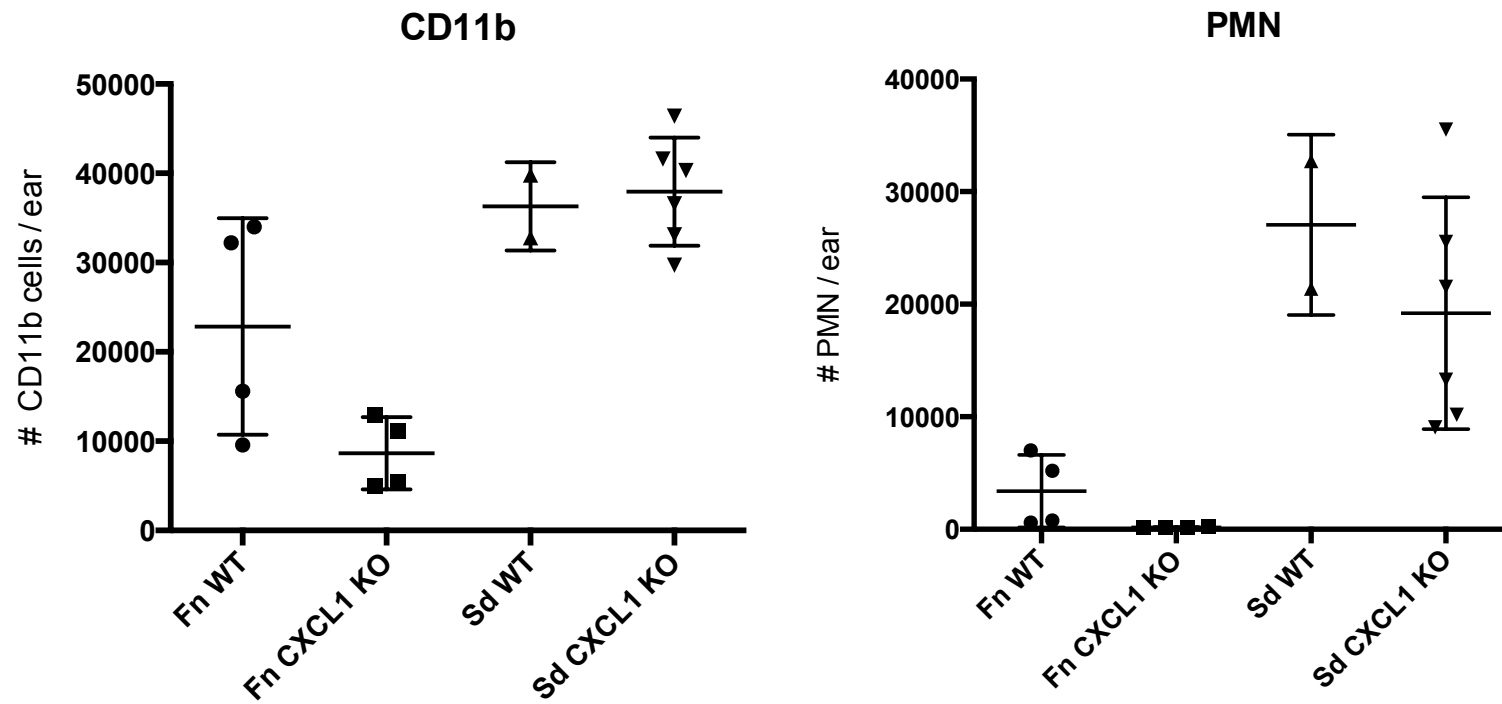

**Figure S3. Neutrophils are still recruited to the chronic lesions in *LmSd* infected *CXCL1*<sup>-/-</sup> mice.** Mice were infected in the ear dermis with 1000 *LmFn* or *LmSd* metacyclic promastigotes and ear tissues were processed at 20 wks post-infection. The total numbers of CD11b<sup>+</sup> and CD11b<sup>+</sup>Ly6C<sup>int</sup> Ly6G<sup>+</sup> (PMN) per ear are shown with means  $\pm$  SD.

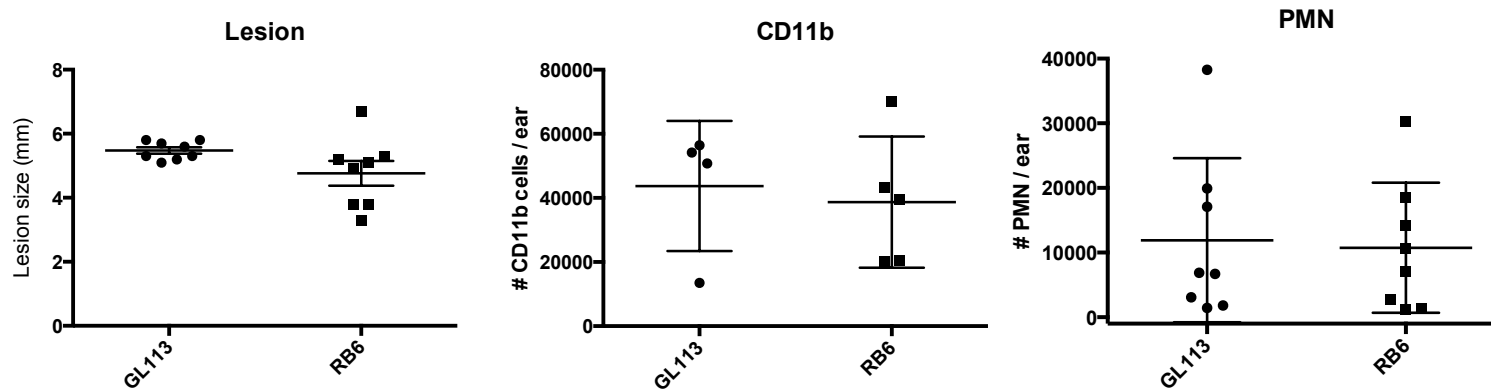

**Fig S4. Treatment with RB6 antibody fails to moderate pathology or to reduce neutrophil recruitment to the site.** C57BL/6 mice were infected in the ear dermis with 1000 *LmSd* metacyclic promastigotes. At 10 wks post-infection, mice were injected i.p. with 0.5 mg RB6-8C5 or GL113 every 3-4 days for a total of 5 injections. Lesion scores were measured at 12.5 wks, and ear tissue was processed to determine the total numbers of CD11b+ and CD11b+Ly6C<sup>int</sup> Ly6G<sup>+</sup> (PMN) per ear. Values shown are means ± SD. This experiment was repeated a total of three times with similar results.
